## RESEARCH ARTICLE

# Multilocus sequence typing of *Candida albicans* oral isolates reveals high genetic relatedness of mother-child dyads in early life

Naemah Alkhars<sup>1,2</sup>, Nisreen Al Jallad<sup>3</sup>, Tong Tong Wu<sup>4</sup>, Jin Xiao<sup>3\*</sup>

**1** Department of General Dental Practice, College of Dentistry, Health Science Center, Kuwait University, Safat, Kuwait, **2** Translational Biomedical Science Program, Clinical and Translational Science Institute, University of Rochester School of Medicine and Dentistry, Rochester, New York, United States of America, **3** Eastman Institute for Oral Health, University of Rochester Medical Center, Rochester, New York, United States of America, **4** Department of Biostatistics and Computational Biology, University of Rochester Medical Center, Rochester, New York, United States of America

\* [jin\\_xiao@urmc.rochester.edu](mailto:jin_xiao@urmc.rochester.edu)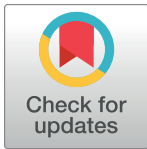**OPEN ACCESS**

**Citation:** Alkhars N, Al Jallad N, Wu TT, Xiao J (2024) Multilocus sequence typing of *Candida albicans* oral isolates reveals high genetic relatedness of mother-child dyads in early life. PLoS ONE 19(1): e0290938. <https://doi.org/10.1371/journal.pone.0290938>

**Editor:** Geelsu Hwang, University of Pennsylvania, UNITED STATES

**Received:** August 19, 2023

**Accepted:** November 14, 2023

**Published:** January 17, 2024

**Peer Review History:** PLOS recognizes the benefits of transparency in the peer review process; therefore, we enable the publication of all of the content of peer review and author responses alongside final, published articles. The editorial history of this article is available here: <https://doi.org/10.1371/journal.pone.0290938>

**Copyright:** © 2024 Alkhars et al. This is an open access article distributed under the terms of the [Creative Commons Attribution License](https://creativecommons.org/licenses/by/4.0/), which permits unrestricted use, distribution, and reproduction in any medium, provided the original author and source are credited.

**Data Availability Statement:** Sequence reads were deposited and are available from the NCBI Sequence Read Archive (SRA; Bioproject number PRJNA926612). Additional isolate sequences and

## Abstract

*Candida albicans* is a pathogenic fungus recently recognized for its role in severe early childhood caries development (S-ECC). *C. albicans* oral colonization begins at birth, but the extent of the mother's involvement in yeast transmission to their children is unclear, therefore, this study used a prospective mother-infant cohort to investigate the maternal contribution of *C. albicans* oral colonization in early life. Oral samples were collected from 160 mother-child dyads during pregnancy and from birth to two years of life. We used whole-genome sequencing to obtain the genetic information of *C. albicans* isolates and examined the genetic relatedness of *C. albicans* between mothers and their children using Multilocus Sequence Typing. Multivariate statistical methods were used to identify factors associated with *C. albicans*' acquisition (horizontal and vertical transmissions). Overall, 227 *C. albicans* oral isolates were obtained from 93 (58.1%) of mother-child pairs. eBURST analysis revealed 16 clonal complexes, and UPGMA analysis identified 6 clades, with clade 1 being the most populated 124 isolates (54.6%). Significantly, 94% of mothers and children with oral *C. albicans* had highly genetically related strains, highlighting a strong maternal influence on children's *C. albicans* acquisition. Although factors such as race, ethnicity, delivery method, and feeding behaviors did not show a significant association with *C. albicans* vertical transmission, the mother's oral hygiene status reflected by plaque index (PI) emerged as a significant factor; Mothers with higher dental plaque accumulation (PI  $\geq 2$ ) had a significantly increased risk of vertically transmitting *C. albicans* to their infants [odds ratio (95% confidence interval) of 8.02 (1.21, 53.24),  $p=0.03$ ]. Furthermore, Black infants and those who attended daycare had an elevated risk of acquiring *C. albicans* through horizontal transmission ( $p < 0.01$ ). These findings highlight the substantial role of maternal transmission in the oral acquisition of *C. albicans* during early life. Incorporating screening for maternal fungal oral carriage and implementing oral health education programs during the perinatal stage may prove valuable in preventing fungal transmission in early infancy.

metadata were obtained from the PubMLST database (<https://pubmlst.org>). All other relevant data are within the manuscript and its [Supporting Information](#) files.

**Funding:** JX; grants K23DE027412 and R01DE031025 from the National Institute of Dental and Craniofacial Research. <https://www.nidcr.nih.gov/> The funders had no role in study design, data collection and analysis, decision to publish, or preparation of the manuscript.

**Competing interests:** The authors have declared that no competing interests exist.

## Introduction

Fungi are diverse and abundant microbial colonizers of human bodies, forming an important part of the mycobiome. Alterations in the mycobiome of specific niches, termed dysbiosis, have been implicated in a range of human diseases [1]. Krom et al. have suggested that fungi may act as keystone species in establishing and maintaining healthy oral ecosystems [2]. The interactions between fungal species and humans can range from mutualistic to parasitic, with the dynamic interplay between them being crucial for maintaining host health [1]. *Candida albicans* is the most commonly detected fungal organism on human mucosal surfaces [3], and it has been shown to colonize the oral cavity as early as a few hours after birth [4, 5]. This early colonization poses a significant health risk to immunocompromised infants, particularly those with low birth weights [6]. In pediatric medicine, contagious colonization of newborn infants by *C. albicans* has been recognized, and the transmission has been reported to be vertical and horizontal [7]. Moreover, *C. albicans* can cause a range of infections in humans, from mucosal infections to systemic infections [8].

*C. albicans* is a diploid fungal species with significant genetic heterozygosity. Its genome consists of eight pairs of chromosome homologs, ranging in size from 0.95 to 3.3 Mb, totaling up to 16 Mb [9]. This heterozygosity has implications for the study of this organism, including its phenotyping and genotyping. [S1 Fig](#) depicts the phylogenetic position of *C. albicans* within the fungal kingdom.

Phenotyping and genotyping of *Candida* strains are crucial methods for investigating nosocomial candidiasis. These methods can identify outbreak-related strains, determine the origins of infection, and track the transmission of strains. Additionally, genotyping can help evaluate the diversity of isolates within a carrier and investigate recurrent infections to identify particularly virulent strains, if any. Furthermore, tracking the emergence of drug-resistant strains is vital in guiding the development of new antifungal therapies [10]. The species' population structure and diversity can also be studied using genotyping methods. For instance, Multilocus Sequence Typing (MLST) is a useful method for identifying the genetic diversity of isolates within a population and investigating evolutionary relationships among them [11].

In epidemiological studies, the typing methods used to characterize *C. albicans* isolates vary considerably. Molecular characterization methods are more discriminatory and accurate than phenotypic methods and are therefore preferred. There are two major classes of *C. albicans* typing methods: non-DNA-based and DNA-based techniques [11]. Non-DNA-based methods include protein fingerprint comparisons and Multilocus Enzyme Electrophoresis (MLEE), while DNA-based methods directly analyze polymorphisms within various DNA markers. DNA-based techniques are classified into conventional typing methods and exact DNA-based techniques. The conventional typing methods include electrophoretic karyotyping (EK), restriction enzyme analysis (REA), and random amplified polymorphic DNA (RAPD). Furthermore, exact DNA-based techniques generate highly reproducible typing data, such as MLST [11], which has been used successfully in the population genetics and molecular phylogeny studies of *C. albicans* [12]. Pulsed Field Gel Electrophoresis (PFGE), Ca3 fingerprinting, and MLST are highly discriminatory and accurate typing methods that outperform phenotypic techniques [13]. Therefore, it is feasible to lead a *C. albicans* relatedness analysis using the MLST technique [14].

*C. albicans* is a ubiquitous fungal organism that commonly colonizes the oral cavity of healthy individuals. The prevalence of *C. albicans*' carriage varies depending on multiple factors, including age, gender, diet, geographic location, socioeconomic status, immunosuppression, and medication use [15]. Studies have reported that the oral carriage of *C. albicans* has been detected in 46% of healthy infants and 69% of adults [8, 16]. However, infants are more

susceptible to oral candidiasis, with up to 37% of infants experiencing this opportunistic fungal infection, especially until six months of age [17]. Elderly individuals who wear dentures are also at increased risk of developing oral candidiasis, with up to 54% of denture wearers experiencing this condition [17]. Pregnant and postpartum women are also more likely to experience oral candidiasis and *C. albicans* colonization, possibly due to hormonal changes that affect the oral microbiome [18, 19]. Moreover, *C. albicans* is also known to cause infections in other body sites, including the genital area. Vulvovaginal candidiasis (VVC) is a common fungal infection that affects up to 75% of women at some point in their lives [20]. Pregnant women, especially in their third trimester, are at higher risk of VVC due to increased estrogen levels in the vaginal mucosa that promote yeast adhesion and penetration [21, 22].

*C. albicans* is a polymorphic fungus, which can switch between different morphological forms, such as yeast, hyphae, and pseudohyphae, depending on the environmental conditions [23]. This polymorphic nature is considered a key virulence factor that plays a critical role in the transition from commensalism to parasitism [1]. The ability of *C. albicans* to switch between these forms is thought to facilitate its survival and persistence within the host. Recent studies have shown that the presence of *C. albicans* can contribute to the development of dental caries by enhancing the cariogenicity of *Streptococcus mutans*, a bacterium commonly associated with dental caries [24, 25]. This may occur through the production of organic acids such as lactic acid by both *C. albicans* and *S. mutans*. *C. albicans* is also known to be capable of fermenting carbohydrates in the diet, producing acids that can dissolve away the mineralized tooth structure, leading to the development of dental caries [26, 27]. Epidemiological data have suggested that *C. albicans* is involved in the pathogenesis of dental caries [28]. Studies have reported that *C. albicans* can be detected in the saliva and dental plaque of individuals with dental caries and that its concentration is higher in those with active caries than in those without [24, 29, 30]. Furthermore, *C. albicans* has been shown to form biofilms on the surface of teeth, which can promote the retention of other microorganisms and contribute to the development of dental caries [25].

Recent research has revealed that the significance of *C. albicans* as a potent caries microbe has often been underestimated compared to the well-known cariogenic *S. mutans* [31]. While maternal transmission of *S. mutans* has been extensively studied and documented as a method by which children are initially colonized with this bacterium [32], transmission patterns of *C. albicans* in children at high risk of severe early childhood caries (S-ECC) have not yet been investigated. To address this gap in knowledge, a study was conducted to identify and genotype oral *C. albicans* isolates from mother-child dyads to determine the possibility of vertical transmission in early life. The study also aimed to identify the factors associated with the vertical and horizontal transmission of *C. albicans*, which could help design measures to limit and prevent the transmission of this pathogenic fungi, possibly reducing the burden of S-ECC experience.

## Material and methods

### Study population and *Candida* isolates

Pregnant women and their children were obtained from a birth cohort study that studied the association between early-life oral *Candida* colonization and the onset of dental caries in children [33]. The study protocol was approved by the University of Rochester Research Subject Review Board (#67191). Written informed consent was obtained from pregnant women to participate in the study and allow the review of their medical records. For children, their legal guardians reviewed and signed a written permission form authorizing their participation and the review of their medical records. The participants were recruited from patients who visited

the University of Rochester Highland Family Medicine (HFM) or Eastman Institute for Oral Health (EIOH) Perinatal Dental Clinic between November 2017 and August 2020. The study was fully completed in May 2022. Self-reported questionnaires were administered to gather information on the demographic, socioeconomic, oral behavior, medical, and medication backgrounds of the mothers and children. These questionnaires were then cross-checked with the subjects' electronic medical records. The authors had access to identifiable participant information during and after the data collection process. To determine the required sample size, a calculation was performed based on the estimated proportion of 60% for the occurrence of identical or highly genetically related *C. albicans* strains between mothers and children. This proportion was compared with the range of 14% to 41% reported in the literature for the general population [7, 34]. The average of these reported proportions (35%) was used as the null proportion in the calculation. A one-sided z-test with an alpha level of 0.05 was employed to achieve 80% power. Based on these considerations, a total of 30 mother-child pairs were required for the study. The study employed a comprehensive protocol using established techniques for clinical examination and sample collection [35, 36]. Clinical isolates of *Candida* species were obtained from the saliva and dental plaque of pregnant women and their children, as described in [S1 Appendix](#). These isolates were identified based on their specific color after being grown on BBL™ CHROMagar™ Candida (BD, Sparks, MD, USA). Two isolates per sample were selected and stored in a sterilized 1.5 ml Eppendorf tube and kept frozen in a -80°C freezer for future use. For our current study, one isolate was used for subsequent analysis. The study comprised eight visits: prenatal (during the mother's third trimester) for the mothers and 1, 2, 4, 6, 12, 18, and 24 months after delivery, for the infants. The initial/baseline visit for infants typically occurred at 1 month of age. However, for infants who missed the 1-month visit, their initial visit is considered to be the first one when they infant were enrolled in the study. In the case of mothers (n=51), only one isolate was analyzed. Among the children (n=78), the number of isolates varied from one subject to another. For each study visit, when each child tested positive for *C. albicans*, one isolate was selected for MLST analysis. [S1 Table](#) details the number and source of each isolate at different study visit times.

### Inclusion and exclusion criteria

Third-trimester pregnant women (beyond 28 gestational weeks), 18 years of age or older, and eligible for New York State-supported medical insurance based on their income level ( $\leq 138\%$  of the federal poverty line) were included in the study. Mothers and infants who had received oral and/or systemic antifungal therapy within 90 days of the initial study visit or had severe systemic medical conditions (such as human immunodeficiency virus infection) that increased their susceptibility to yeast infections were excluded from the study. Infants included in the study were born to the participating mothers, with the exception of those who met any of the following exclusion criteria: 1) being born prematurely (before 37 weeks of gestation), 2) having a low birth weight (less than 2,500 grams), 3) having Down syndrome, 4) having orofacial deformities (such as cleft lip, cleft palate, or oral-pharyngeal mass), or 5) having received oral and/or systemic antifungal treatment prior to the initial study visit.

### Oral examination and data/sample collection

Comprehensive oral examination and data/sample collection occurred at all study visits. A comprehensive oral examination (caries score, plaque index, and oral candidiasis) and oral sample collection (saliva and plaque) were performed by 1 of 3 calibrated dentists in a dedicated examination room at the University of Rochester clinics, using standard dental examination equipment, materials, and supplies, under portable lighting, using methods detailed in [S1](#)

[Appendix](#). To ensure consistency and reliability of the evaluated criteria, inter- and intra-examiner agreement was determined by  $\kappa$  statistics and exceeded 83% at the calibration.

### DNA extraction, illumina library preparation, and whole genome sequencing

Cells from  $-80^{\circ}\text{C}$  stock cultures were streaked on Yeast Peptones Dextrose agar (YPD) and then incubated for 48 hours at  $37^{\circ}\text{C}$ . One colony was randomly selected from each dish for DNA extraction, and overnight cultures were prepared. The clinical isolates' whole genome DNA (gDNA) was extracted using the MasterPure™ kit (Lucigen Corp, Middleton, WI, USA), following the manufacturer's instructions. Next, the Nextera XT kit (Illumina, Inc., San Diego, CA, USA) was used to construct libraries with 3 ng of gDNA as input. The Fragment Analyzer and Qubit were used to measure the fragment size profiles and quantify the libraries, respectively. The libraries were standardized to 1.75 nM and sequenced on a NovaSeq 6000 using an SP flow cell with 150-bp paired-end reads. Sequence reads were deposited in the NCBI Sequence Read Archive (SRA: Bioproject number PRJNA926612).

### Genome assembly

TrimGalore (version 0.6.7) [37] was used to remove Nextera adapters, low-quality reads (quality  $<25$ ), and short reads (length  $<75$ ). The trimmed and filtered reads were used as input into SPAdes (version 3.15.2) [38] for de-novo genome assembly with default settings.

### MLST of *C. albicans* isolates

MLST was performed by the sequencing results of the internal fragment of seven *C. albicans* housekeeping genes (*AAT1a*, *ACCI*, *ADP1*, *MPIb*, *SYA1*, *VPS13*, and *ZWF1b*), ranging from 373-491 base pairs (bps) and producing a total of 2883 concatenated nucleotide bps (S2 Table) [39]. Samples that were found to be other than *C. albicans* were excluded from the analysis, resulting in a complete MLST analysis of 227 samples (51 mothers and 78 children). Novel and previously known alleles for each gene were identified and given an integer number corresponding to an "allelic profile" using the non-redundant database program on the MLST website (<https://pubmlst.org>). The combination of the seven distinct allelic profiles for each isolate was then considered a unique diploid sequence type (DST). New allele numbers, including new DSTs, were provided by the curator: Dr. Marie-Elisabeth Bougnoux, and their details are presented in S3 Table.

### Phylogenetic analysis and global population structure of *C. albicans*

To investigate the evolutionary relationships among *C. albicans* isolates, we constructed a dendrogram using the unweighted pair group method with an arithmetic average (UPGMA) analysis of the concatenated MLST sequences [40, 41]. A further 3000 validated isolates archived in the MLST database (<https://pubmlst.org>) were included in the phylogenetic analysis to explore the evolutionary relationships between the DSTs. The UPGMA trees were generated using MEGA 11 software [42] and displayed using the online tool, Interactive Tree of Life [43]. In addition, we generated a minimum spanning (MS) tree and neighbor-joining (NJ) tree [44] using the online software available at the database (<https://online.phyloviz.net/index>) [45] and MEGA 11 software [42], respectively. To investigate the evolutionary ancestry patterns among the *C. albicans* isolates, we categorized the fungal population into clonal complexes (CCs). These CCs represent clusters of genetically closely related isolates. The CCs and the founder DSTs, where possible, were obtained using global optimal eBURST (goeBURST) analysis

through the PHYLOViZ 2.0 software [46]. Isolates that shared five out of the seven MLST genes were considered to belong to the same CC [46]. The output of this analysis demonstrated the simplest patterns of descent from the ancestral type for each DST (Fig 3).

## Data and statistical analysis

Children were grouped based on their oral *C. albicans* status, and the characteristics of the two groups (*C. albicans* positive vs. *C. albicans* negative) were compared using the t-test for continuous variables and Pearson's chi-square or Fisher's exact tests for categorical variables.

Categorical variables were presented as frequencies (%), and continuous variables were described using mean and standard deviation. Multiple logistic regression was used to evaluate the factors associated with the vertical and horizontal transmission of *C. albicans* isolated from children (Y/N). The data were analyzed using R Studio v4.2.2. Statistical significance was determined by a p-value < 0.05.

## Results

### Clinical and demographic features

The studied population included 160 mother-child dyads; Table 1 illustrates the demographic, socioeconomic, medical, and oral characteristics of the participating mothers and their children. The results indicated no significant association between the detection status of *C. albicans* and child gender, ethnicity, or birth route (p-value > 0.05). However, Black children had a higher rate of *C. albicans* detection compared to their White or other races counterparts (p-value = 0.007). Furthermore, children diagnosed with oral thrush had a significantly higher rate of *C. albicans* detection (p-value < 0.001). Additionally, children in the *C. albicans* positive group received more antifungal treatment and showed a higher rate of *S. mutans* detection by

**Table 1. Demographic, socioeconomic, medical, and dental background of mother-child dyads.**

| Categories                                |              | Enrolled n=160 (%) | Child <i>C. albicans</i> Status |                   | p value           |
|-------------------------------------------|--------------|--------------------|---------------------------------|-------------------|-------------------|
|                                           |              |                    | Negative n=82 (%)               | Positive n=78 (%) |                   |
| Gender                                    | Male         | 80 (50)            | 40 (49)                         | 40 (51)           | 0.75              |
| Race                                      | Black        | 91 (57)            | 37 (45)                         | 54 (69)           | <b>0.007</b>      |
|                                           | White        | 34 (21)            | 21 (26)                         | 13 (17)           |                   |
|                                           | Other        | 35 (22)            | 24 (29)                         | 11 (14)           |                   |
| Ethnicity                                 | Non-Hispanic | 136 (85)           | 68 (83)                         | 68 (87)           | 0.45              |
| Birth weight (gm)                         |              | 3313±425           | 3315±389                        | 3312±462          | 0.96              |
| Birth route                               | Vaginal      | 119 (74)           | 59 (72)                         | 60 (77)           | 0.47              |
| Siblings (Y)                              |              | 107 (67)           | 54 (66)                         | 53 (68)           | 0.78              |
| Ever breastfeeding (Y)                    |              | 115 (72)           | 63 (77)                         | 52 (67)           | 0.15              |
| Night bottle feeding (2 months)           |              | 102 (64)           | 44 (54)                         | 58 (74)           | 0.02              |
| Tooth brushing (Y)                        | 12 months    | 93 (70)            | 42 (69)                         | 51 (70)           | 0.90              |
|                                           | 18 months    | 119 (94)           | 56 (93)                         | 63 (94)           | 0.87              |
|                                           | 24 months    | 117 (73)           | 56 (100)                        | 61 (98)           | 0.34              |
| Oral thrush diagnosis (Y)                 |              | 23 (14)            | 3 (4)                           | 20 (26)           | <b>&lt;0.0001</b> |
| Diaper rash diagnosis (Y)                 |              | 13 (8)             | 6 (7)                           | 7 (9)             | 0.70              |
| Child antibiotic treatment* (Y)           |              | 29 (18)            | 14 (17)                         | 15 (19)           | 0.72              |
| Child antifungal treatment* (Y)           |              | 31 (19)            | 8 (10)                          | 23 (29)           | <b>0.002</b>      |
| 2y Child <i>C. albicans</i> detection (Y) |              | 78 (49)            | na                              | na                | na                |
| 2y Child <i>S. mutans</i> detection (Y)   |              | 98 (61)            | 41 (50)                         | 57 (73)           | <b>0.003</b>      |

(Continued)

Table 1. (Continued)

| Categories              |                                          |                         |                   | Child <i>C. albicans</i> Status |          |              |
|-------------------------|------------------------------------------|-------------------------|-------------------|---------------------------------|----------|--------------|
|                         |                                          | Enrolled n=160 (%)      | Negative n=82 (%) | Positive n=78 (%)               | p value  |              |
| Maternal factors        | Age of mothers (years)                   |                         | 27.5±5.4          | 28.5±5.8                        | 26.4±4.8 | <b>0.02</b>  |
|                         | Employment (Y)                           |                         | 81 (51)           | 47 (57)                         | 34 (44)  | 0.08         |
|                         | Emotional condition (Y)                  |                         | 57 (36)           | 26 (32)                         | 31 (40)  | 0.29         |
|                         | Smoking (Y)                              |                         | 26 (16)           | 15 (18)                         | 11 (14)  | 0.47         |
|                         | Diabetes (Y)                             |                         | 10 (6)            | 9 (11)                          | 1 (1)    | <b>0.01</b>  |
|                         | Hypertension (Y)                         |                         | 20 (13)           | 11 (13)                         | 9 (12)   | 0.72         |
|                         | Asthma (Y)                               |                         | 22 (14)           | 15 (18)                         | 7 (9)    | 0.09         |
|                         | Vaginal candidiasis during pregnancy (Y) |                         | 26 (16)           | 10 (12)                         | 16 (21)  | 0.15         |
|                         | Vaginal candidiasis 6m postpartum (Y)    |                         | 2 (1)             | 1 (1)                           | 1 (1)    | 0.97         |
|                         | Antifungal used during pregnancy (Y)     |                         | 38 (24)           | 18 (22)                         | 20 (26)  | 0.58         |
|                         | Antifungal used 6m postpartum (Y)        |                         | 20 (13)           | 11 (13)                         | 9 (12)   | 0.72         |
|                         | Antibiotics used during pregnancy (Y)    |                         | 55 (34)           | 22 (27)                         | 33 (42)  | <b>0.04</b>  |
|                         | Antibiotics used 6m postpartum (Y)       |                         | 29 (18)           | 14 (17)                         | 15 (19)  | 0.72         |
|                         | Marital status (Married)                 |                         | 35 (22)           | 23 (28)                         | 12 (15)  | 0.053        |
|                         | Number of children                       | 0                       | 53 (33)           | 28 (34)                         | 25 (32)  | 0.92         |
|                         |                                          | 1                       | 45 (28)           | 22(27)                          | 23 (30)  |              |
|                         |                                          | ≥2                      | 62 (39)           | 32 (39)                         | 30 (38)  |              |
|                         | Education                                | Middle school           | 15 (9)            | 7 (9)                           | 8 (10)   | 0.40         |
|                         |                                          | High school             | 83 (52)           | 38 (46)                         | 45 (58)  |              |
|                         |                                          | Associate               | 21 (13)           | 13 (16)                         | 8 (10)   |              |
|                         |                                          | ≥College                | 41 (26)           | 24 (29)                         | 17 (22)  |              |
|                         | Tooth brushing                           | Not daily               | 11 (7)            | 4 (5)                           | 7 (9)    | 0.33         |
|                         |                                          | Once                    | 46 (29)           | 21 (26)                         | 25 (32)  |              |
|                         |                                          | Twice                   | 103 (64)          | 57 (69)                         | 46 (59)  |              |
|                         | Salivary <i>C. albicans</i>              | No                      | 79 (49)           | 50 (61)                         | 29 (37)  | <b>0.002</b> |
|                         |                                          | 1-400CFU/ml             | 38 (24)           | 19 (23)                         | 19 (24)  |              |
|                         |                                          | >400CFU/ml              | 43 (27)           | 13 (16)                         | 30 (38)  |              |
|                         | Plaque <i>C. albicans</i>                | No                      | 102 (64)          | 58 (71)                         | 44 (57)  | <b>0.16</b>  |
|                         |                                          | 1-400CFU/ml             | 14 (9)            | 7 (8)                           | 7 (9)    |              |
|                         |                                          | >400CFU/ml              | 43 (27)           | 17 (21)                         | 26 (34)  |              |
|                         | Salivary <i>S. mutans</i>                | <10 <sup>5</sup> CFU/ml | 54 (34)           | 29 (35)                         | 25 (32)  | 0.66         |
|                         |                                          | ≥10 <sup>5</sup> CFU/ml | 106 (66)          | 53 (65)                         | 53 (68)  |              |
| Plaque <i>S. mutans</i> | <10 <sup>6</sup> CFU/ml                  | 102 (64)                | 53 (65)           | 49 (64)                         | 0.90     |              |
|                         | ≥10 <sup>6</sup> CFU/ml                  | 57 (36)                 | 29 (35)           | 28 (36)                         |          |              |
| Decayed teeth number    |                                          | 2.7±3.8                 | 2.4±3.4           | 3.1±4.1                         | 0.25     |              |
| Decayed teeth           | ≤3                                       | 116 (73)                | 64 (78)           | 52 (67)                         | 0.11     |              |
|                         | >3                                       | 44 (27)                 | 18 (22)           | 26 (33)                         |          |              |
| Missing teeth number    |                                          | 1.1±2.8                 | 1.0±1.8           | 1.2±3.5                         | 0.69     |              |
| Missed teeth            | ≤3                                       | 148 (92)                | 77 (94)           | 71 (91)                         | 0.49     |              |
|                         | >3                                       | 12 (8)                  | 5 (6)             | 7 (9)                           |          |              |
| Filled teeth number     |                                          | 3.0±3.4                 | 3.3±3.4           | 2.7±3.4                         | 0.31     |              |
| Filled teeth            | ≤3                                       | 103 (64)                | 52 (63)           | 51 (65)                         | 0.79     |              |
|                         | >3                                       | 57 (36)                 | 30 (37)           | 27 (35)                         |          |              |

\*Includes either IV, oral suspension, cream/ointments/suppository, or shampoo.

Results are shown in prevalence n (%) or mean (standard deviation).

<https://doi.org/10.1371/journal.pone.0290938.t001>

the age of two years (p-value = 0.002 and 0.003 respectively). With respect to maternal characteristics, children with *C. albicans* detections were born to mothers with lower mean ages (p-value = 0.02), free of diabetes (p-value = 0.01), and who had received antibiotics treatment during pregnancy (p-value = 0.04), in comparison to those in the *C. albicans* negative group. Moreover, children whose mothers had higher salivary *C. albicans* carriage levels had a significantly higher rate of *C. albicans* detection (p-value = 0.002). No significant differences were observed in relation to mothers' educational levels, which encompassed middle school, high school, an associate degree typically completed in two years, a bachelor's degree typically requiring four years, and >College, which is post-graduate study. S2 Fig displays the various feeding practices, such as exclusive breastfeeding, exclusive bottle feeding, a combination of both, night breastfeeding, and night bottle feeding among the enrolled children. At two months, night bottle feeding was significantly higher in the *C. albicans* positive group (p = 0.02).

### *Candida* transmission profile in mother-child dyads

As shown in Fig 1, we compared the detection of *Candida* spp. in mothers and children at various study time points. The proportion of mother-child pairs with positive *Candida* detection increased from 9% at one month to 36% at 12 months, then stabilized at 33% from 12 to 18 months before slightly decreasing to 29% at 24 months, as depicted in the upper panel of Fig 1. The middle panel of the figure shows the percentage of mothers and children sharing the same type (green) or different types (blue) of *Candida* spp. Overall a total of 36 mother-child dyads (22.5% of all pairs) had simultaneous colonization by *C. albicans*, three (1.9% of all pairs) by *C.*

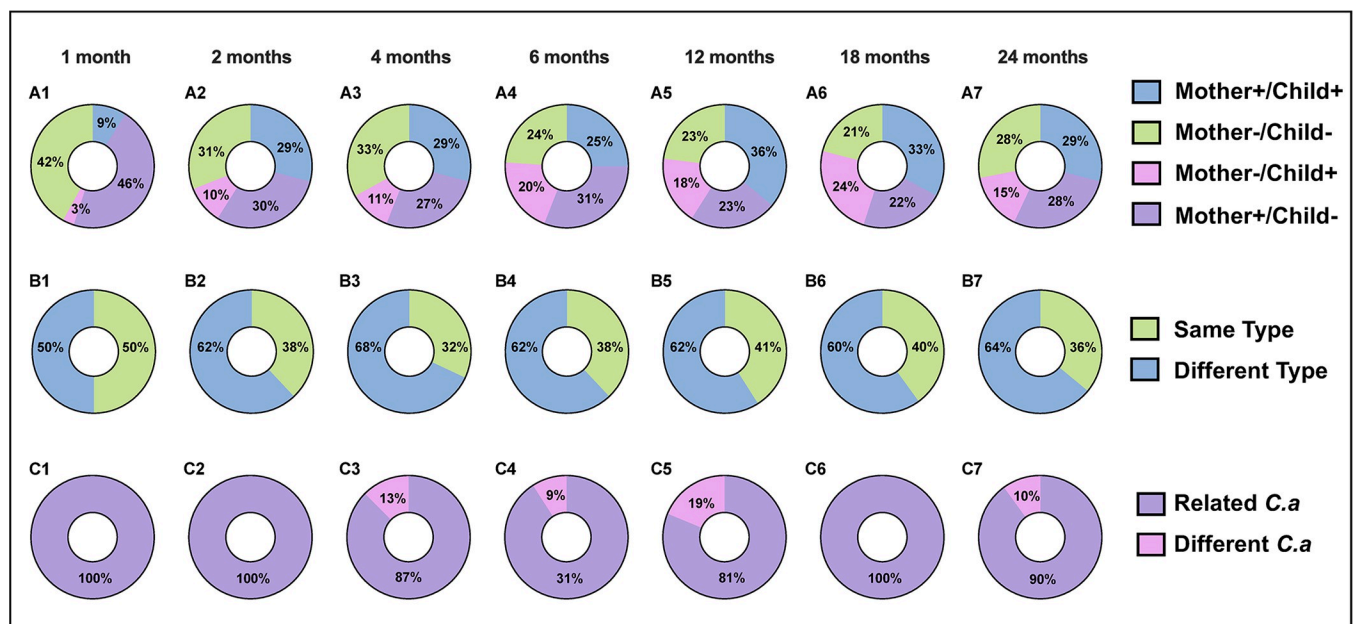

**Fig 1. Oral *Candida* comparison among mother-child dyads in the first two years of child's life.** The upper panel demonstrates oral *Candida* detection status among mother-child dyads. The status is categorized as mother and child both positive of *Candida* (blue), mother and child both negative of *Candida* (green), mother negative but child positive of *Candida* (pink), and mother positive but child negative (purple). Nine percent of the 36 mother-infant dyads had positive *Candida* detection in their oral cavity at 1 month, whereas 36% of the mother-infant dyads had positive *Candida* detection at 12 months. The middle panel represents the percentage of mothers and children who share the same type (green) or different type (blue) of *Candida* species, including *C. albicans*, *C. parapsilosis*, *C. dubliniensis*, *C. lusitanae*, *C. krusei*, *C. glabrata*, or *C. tropicalis*. The lower panel indicates the genetic relatedness of *C. albicans* between mothers and children by MLST nucleotide analysis; genetically related (purple)  $\geq 99\%$  similar and genetically different (pink)  $< 99\%$  similar. *C.a.*, *C. albicans*.

<https://doi.org/10.1371/journal.pone.0290938.g001>



*parapsilosis*, two by *C. dubliniensis* (1.3% of all pairs), and one by *Candida lusitanae* (0.6% of all pairs). The lower panel displays the genetic similarity of *C. albicans* between mothers and children using MLST nucleotide analysis. The purple portion represents a genetic similarity of  $\geq 99\%$ , indicating genetically related isolates, while the pink portion represents a genetic similarity of  $< 99\%$ , indicating a distinct genetic profile. Strikingly, the similarity of genotypic profiles was observed in 94% ( $n = 34/36$ ) of mother-child dyads with *C. albicans*.

### Transmission rate of *C. albicans* and factors associated with vertical and horizontal transmission

The transmission of *C. albicans* was classified as vertical when children were born to mothers who tested positive for this fungus. On the other hand, horizontal transmission was used to describe cases where children were born to mothers who tested negative for *C. albicans*. To identify the factors associated with vertical and horizontal transmission of *C. albicans*, logistic regression models were utilized. These models considered various predictor variables such as demographics, delivery method, presence of siblings, attendance at daycare, mother's plaque index, mother's salivary *C. albicans* level, and feeding practices. At one month, 60% of the infants showed vertical transmission of *C. albicans*, whereas at 18 months, the percentage of vertical transmission was 36% (Fig 2A). The logistic regression analysis revealed that the mother's plaque index was significantly associated with *C. albicans* vertical transmission (OR, 8.02 [95% CI, 1.21-53.24];  $p = 0.03$ ) (Fig 2B). Additionally, Black race (OR, 3.46 [95% CI, 1.43-8.85];  $p = 0.007$ ) and daycare attendance (OR, 2.90 [95% CI, 1.18-7.39];  $p = 0.02$ ) were positively associated with an increased risk of *C. albicans* horizontal transmission (Fig 2C).

### Statistics of *C. albicans* MLST

For MLST analysis, only one sample per participant was chosen (either saliva or, if the saliva sample was negative, plaque). This resulted in a total of 227 isolates, consisting of 218 saliva samples and 9 plaque samples. A total of 215 unique DSTs were detected from the isolates, and 12 were shared by two isolates. Of the seven fragments analyzed, *VPS13* exhibited the highest discriminatory power, with 31 different allele sequences. *ZWF1b* had the second-highest discriminatory power, with 27 alleles, followed by *AAT1a* (22 alleles), *SYA1* (21 alleles), *ACC1* and *ADPI* (each with 15 alleles), and *MPIb* with the lowest variability (7 alleles). Details of the alleles and DSTs for each isolate are shown as metadata in S3 Fig, together with the age, sex, dental caries diagnosis, and source of the isolates.

### Phylogenetic analysis and global population structure of 3227 *C. albicans* isolates

The MLST data can be utilized for phylogenetic analysis using various methods with different levels of complexity. To identify robust subspecific clades, we used a variety of techniques, with a particular emphasis on techniques that rely on differences at nucleotide sites and gross allele sequence differences.

In the eBURST analysis of the 227 *C. albicans* isolates, 196 were grouped into 16 clonal clusters (CC) using a cluster definition of sharing five or more alleles (Fig 3). The largest cluster, CC 1, included 117 isolates (51.5% of all isolates), with 108 DSTs, and had DST 3883 as the putative ancestral type. CC 2 was the second largest, with 26 isolates (23 DSTs) and no putative founding DST. CC 8 was the third largest, comprising 19 isolates (19 DSTs), with type 3983 predicted as the founding type. CC 7 was composed of five isolates (5 DSTs), with DST 3923 as the putative ancestral type. The remaining CC contained at most four isolates. The remaining

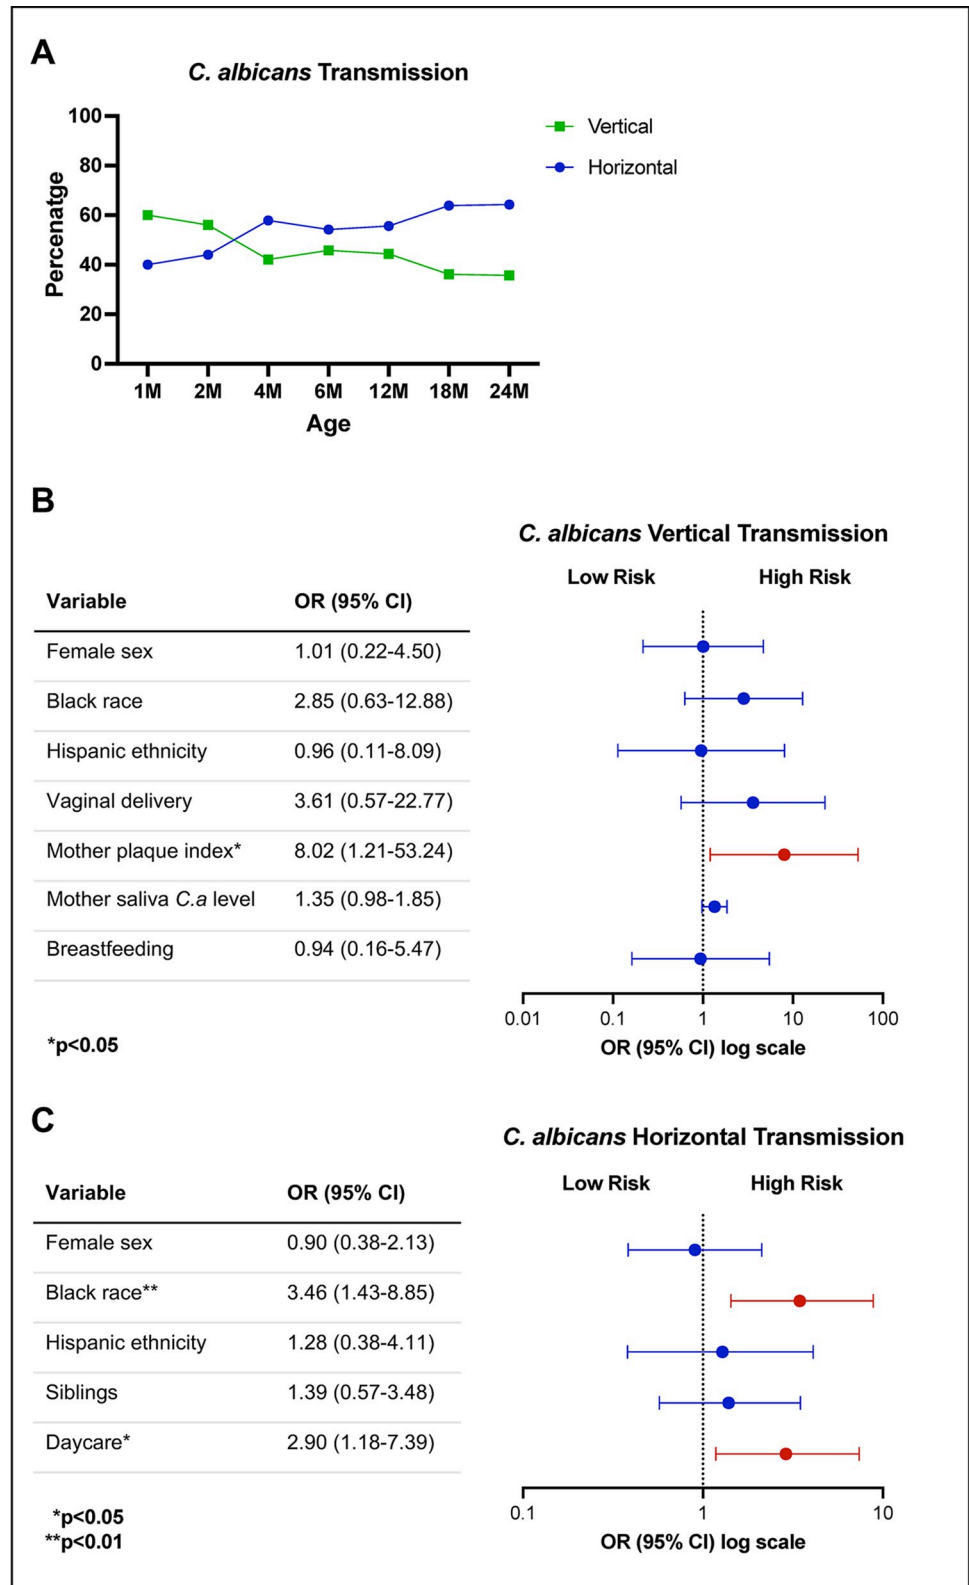

**Fig 2. Time series transmission rate of *C. albicans* and the factors associated with its vertical and horizontal transmission.** At one month, 60% of the infants displayed vertical transmission of *C. albicans*, with the remaining 40% experiencing horizontal transmission. However, by the 18-month visit, the percentage of vertical transmission was

36%, while horizontal transmission was 64%. From the multivariate logistic model, the mother's plaque index was identified as the significant factor associated with *C. albicans*' vertical transmission (OR, 8.02 [95% CI, 1.21-53.24];  $p = 0.03$ ) (B). Regarding *C. albicans* horizontal transmission, the factors associated with increased risk included being of Black race (OR, 3.46 [95% CI, 1.43-8.85];  $p = 0.007$ ) and attending daycare (OR, 2.90 [95% CI, 1.18-7.39];  $p = 0.02$ ) (C).

<https://doi.org/10.1371/journal.pone.0290938.g002>

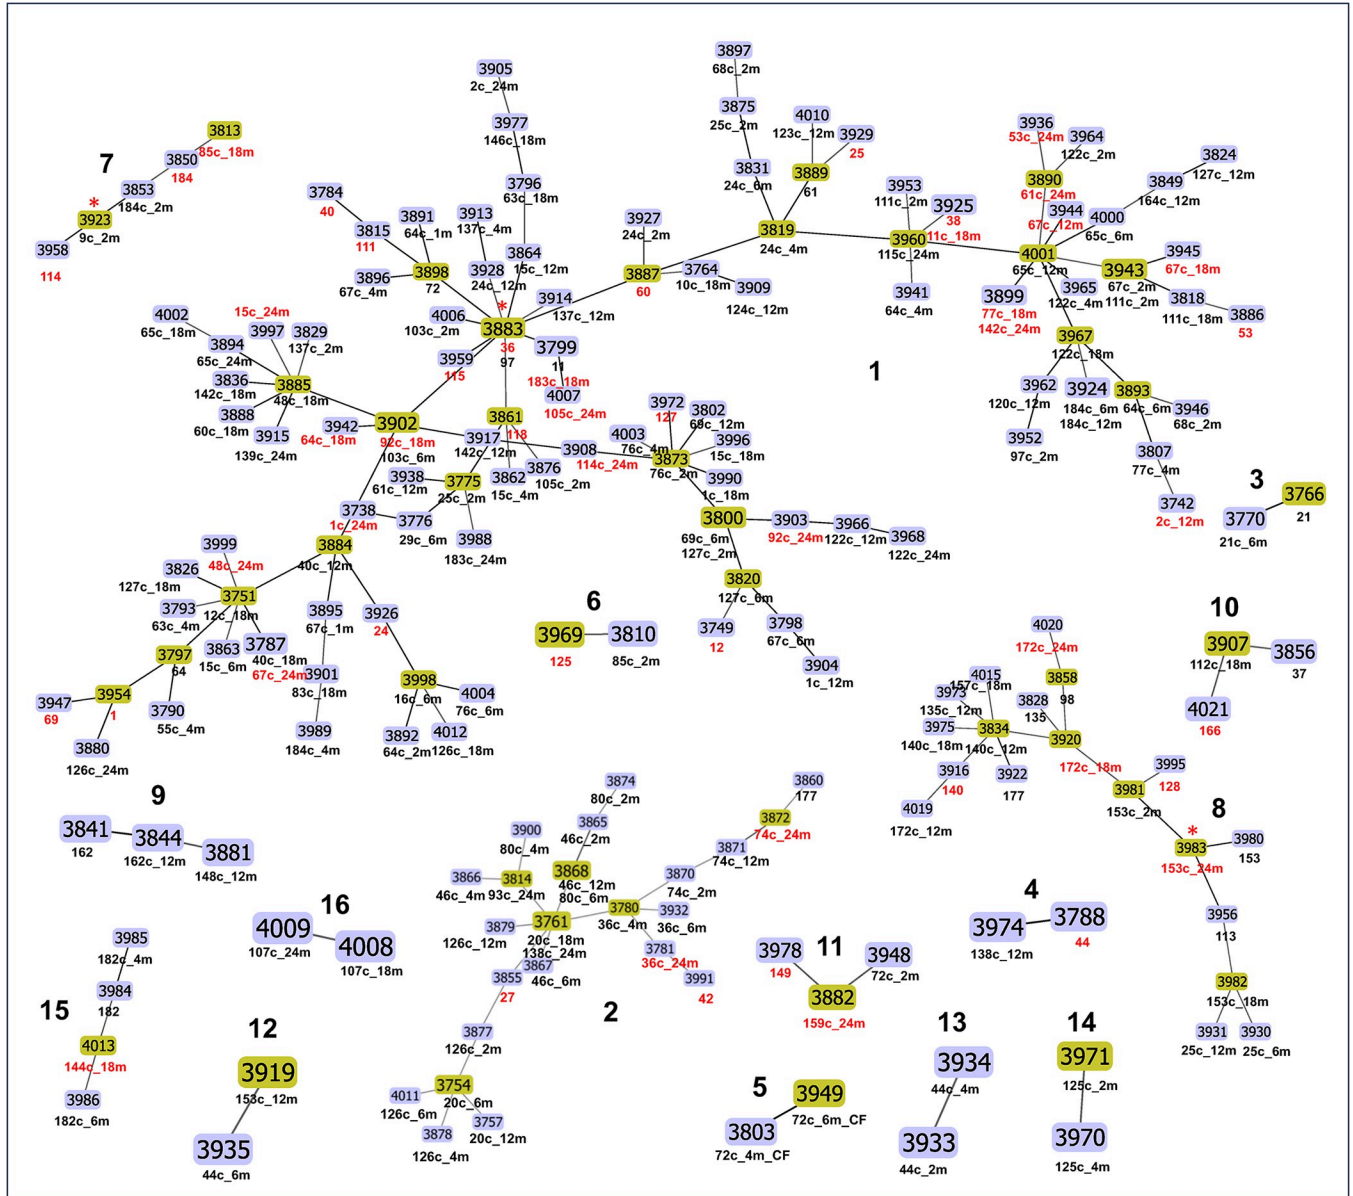

**Fig 3. Snapshot of the 16 clonal clusters identified by eBURST in 227 clinical oral isolates of *C. albicans*.** The isolates were grouped into 16 clusters and 31 singletons (not shown in the figure). Lines connecting the sequence types (DSTs) indicate a hierarchical relationship between them, with those differing in just two of the seven sequenced fragments being joined. When a putative ancestral DST was identified for a cluster, its number was marked with a red asterisk. The clonal clusters of related isolates are numbered in boldface font. Note that the color of DSTs and the length of the lines connecting the DSTs does not hold any significance. Each DST is accompanied by the subject ID and the child's age in months. If no age is specified, it signifies a mother isolate. The caries status is visually represented by font color, with black indicating no caries and red indicating the presence of caries.

<https://doi.org/10.1371/journal.pone.0290938.g003>

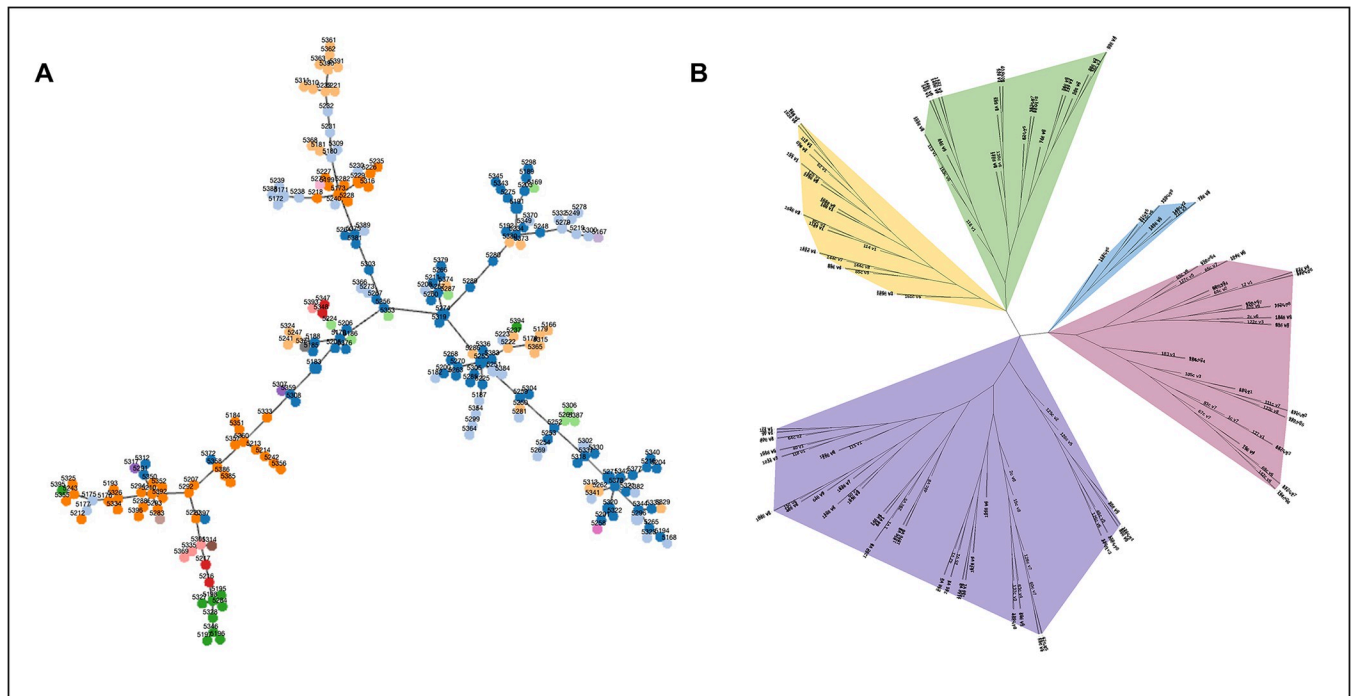

**Fig 4. Minimum spanning (MS) tree and Neighbor-Joining (NJ) tree of 227 *C. albicans* clinical oral isolates from our study.** MS tree was generated based on the allelic profiles of the 227 *C. albicans* strains isolated from our study by PHYLOViZ visualization (A). NJ tree as determined by p-distance of the 227 *C. albicans* strains isolated from our study (B). The tree is presented in a radial format to illustrate the relative positions of the isolates that are related to each other. Clades are highlighted with colored shading to help with visualization.

<https://doi.org/10.1371/journal.pone.0290938.g004>

31 isolates (13.7%) were classified as singletons. Among pairs with *C. albicans*, the CC was identical between mother and child isolates in 64% of cases. Furthermore, we generated MS and NJ trees; these trees provide additional insights into the genetic relatedness and evolutionary history of the *C. albicans* isolates analyzed in this study (Fig 4). The NJ tree generated five closely related clades.

While the eBURST analysis provided a certain perspective on the relationships between isolates, the UPGMA pairwise-difference dendrogram generated for the 227 isolates including a reference strain of *C. albicans* SC5314 (S3 Fig) took a different approach. It did not consider the specific gene fragment where sequence polymorphisms occurred, resulting in a new perspective. In the UPGMA analysis, isolates with only a few differences in the concatenated sequences across all fragments sequenced were considered similar, regardless of where the polymorphic sites were located. The UPGMA dendrogram showed that several eBURST singleton isolates were dispersed within a wide range of UPGMA clades, and isolates from different CC were mixed with one another and with several eBURST singletons.

To investigate the evolutionary relationship between DSTs, we used the first 3000 DSTs from the database (<https://pubmlst.org/>) to generate another UPGMA dendrogram (S4 Fig). This dendrogram classified the DSTs into 20 clades, including singletons. Of these clades, 19 had been previously identified [40], and a new clade was formed that included 16 of the study isolates. The study isolates were categorized into six clades. The largest clade (clade 1) contained 122 isolates (53.7%), while the remaining isolates were distributed among clades 2, 4, 8, 12, and the new clade. In 72% of dyads with *C. albicans*, the UPGMA clade was identical between the mother and child isolates. Additionally, the study found that isolates associated with dental caries diagnosis in mothers or S-ECC in children aged one year or older were

present in all six clades, with no significant predominance in any particular clade. Furthermore, there was no significant association observed between clade assignment and caries diagnosis.

## Discussion

S-ECC is a growing problem worldwide, particularly among low-income populations [47], and *C. albicans* has been found to be a common pathogen linked to the emergence of *S. mutans* bacteria [33] and S-ECC development. *Candida* colonization in children can result from vertical transmission from the mother or horizontal acquisition from non-maternal sources, and early colonization may contribute to a higher risk of disease later. We employed a molecular-based typing method to investigate the genetic relatedness of oral *C. albicans* between mothers and their children. Our study found that mothers can pass on highly related strains of *C. albicans* to their children during early childhood. Furthermore, *C. albicans*' vertical transmission from mothers was associated with maternal plaque index. Moreover, demographic factors such as race and daycare attendance played a role in the horizontal transmission of *C. albicans*. This highlights the crucial role of maternal socioeconomic and oral health behavior in preventing oral *Candida* colonization.

Various factors can influence *Candida* colonization, including age, population demographic, oral hygiene status, sampling techniques, and geographical variations, as well as host immunosuppression, systemic diseases like diabetes mellitus, different blood groupings, and tobacco smoking [15, 48–51]. Despite previous research indicating that individuals with diabetes are at an increased risk of *Candida* colonization due to reduced salivary flow rate compared to non-diabetic individuals [52–54], our study found that children born to diabetic mothers had a lower risk of *C. albicans* acquisition. However, in our study, we found that the Black race was the only significant factor associated with horizontal transmission of *C. albicans* among the factors mentioned above. Some studies suggested that Black individuals could exhibit distinct patterns of oral colonization by this yeast. While it is evident that individuals of Black and African American racial groups face an elevated risk of superficial and invasive *Candida* infections, the precise causal factors remain ambiguous and may be linked to underlying social determinants of health, disparities in healthcare accessibility, and various socioeconomic inequities [55]. Instead, maternal factor, such as the mother's plaque index score, was identified as a significant contributing factor to *C. albicans*' vertical transmission. Furthermore, our results showed that daycare attendance was a significant contributor to *C. albicans*' colonization. Although no studies have assessed the link between attending daycare and oral *Candida* colonization, previous research indicated that daycare increases the risk of carrying antibiotic-resistant pneumococci in children [56]. This could be attributed to the frequent use of antibiotics for upper respiratory tract infections and other unique features of daycare settings, such as children's behavior and immature immune systems [57]. Moreover, our results indicated that maternal use of antibiotics during pregnancy was associated with oral colonization by *C. albicans* in their children. Antibiotics can alter the maternal microbiota, including the vaginal and gastrointestinal environments, which might influence the risk of vertical transmission of *C. albicans* to neonates. A study by Muanda et al. (2017) suggests that maternal antibiotic use is associated with an increased risk of infant *Candida* colonization, underscoring the need for further research to elucidate the intricacies of this relationship [58].

Our study did not find a significant association between the delivery method and oral *Candida* colonization. Some authors suggest that *C. albicans* can be transmitted from mother to child, with possible sources including delivery, skin, vagina, and perianal region. In a study by Zisova et al., vaginal samples were collected from 80 mothers before delivery, and oral and

gastrointestinal samples were taken from their newborns after birth. The study found that all 13 mother-infant pairs with *C. albicans* had identical strains, suggesting vertical transmission [59].

Likewise, Al-Rusan et al. conducted a study that found the mother's vaginal *Candida* to be a significant source of oral *Candida* in newborns, especially those delivered vaginally [5]. In recent years, multiple studies have explored the transmission of *Candida* from maternal vaginal mucosa to neonates using DNA molecular typing techniques. These studies concluded that all *Candida* species present in mother-neonate pairs were indistinguishable [60, 61]. We have not collected vaginal samples that could be a source of *Candida* transmitted to the children.

Our research showed that infants in the *C. albicans* positive group were more likely to have been night bottle-fed at two months ( $p=0.02$ ). In contrast, those in the *C. albicans* negative group were more likely to have been exclusively breastfed at 12 and 18 months ( $p=0.04$ ,  $0.02$ , respectively). Research on the relationship between feeding methods and *Candida* colonization in infants and children has yielded conflicting results. For example, Zöllner and Jorge found that *Candida* species were less common in predominantly breastfed infants compared to those who were bottle-fed ( $p < 0.05$ ) [62]. Conversely, Darwazeh and al-Bashir studied 2-11 months infants and observed no significant differences in the frequency or density of *Candida* species between breastfed, bottle-fed, or mixed-feeding infants ( $p = 0.14$ ) [49]. Similarly, a systematic review found no significant differences in oral *Candida* colonization between breastfed and bottle-fed children [63]. Further research is needed to clarify the relationship between feeding methods and *Candida* colonization in infants and children. Moreover, infants in the *C. albicans* positive group showed a higher likelihood of having a documented history of oral thrush diagnosis and previous use of antifungal medications, aligning with the results reported by Azevedo et al. [64]. Oral thrush is a common infection in early life, affecting 4%-15% of healthy children [65, 66], with *C. albicans* often being the opportunistic microorganism responsible for the infection [67].

Our study did not reveal a significant association between *Candida* colonization and having a sibling. This finding is consistent with a study by Hannula et al., where no significant association was reported between having a sibling and *Candida* colonization in a cohort of 40 infants who were followed up from 2-24 months [68]. However, other studies have reported conflicting results regarding the association between siblings and *Candida* colonization. For instance, Stecksén-Blicks et al. found that the presence of siblings increased the likelihood of oral *Candida* colonization in 12-month-old infants [65]. In contrast, Azad et al. reported a decrease in the richness and diversity of the gut microbiome in infants with older siblings [69].

In the current study, vertical transmission of *C. albicans* was significantly associated with mothers' plaque score. The oral microbiota of the child can be shaped by the mother's influence starting from gestation and continuing into early life through various pathways of vertical transmission including delivery method, close contact, feeding, and oral care practices [70–72].

MLST has proven to be an effective technique for investigating the population structure and epidemiology of *C. albicans* [39, 44, 73, 74]. Geographically, the distribution of known clades differs, with some clades being more common in certain regions of the world than others [75]. For instance, clade 2 predominates in the United Kingdom, while clades 14 and 17 are prevalent in Pacific Rim countries [75]. Clade 1, which is the largest among *C. albicans* clades, has a global distribution [74, 75]. These results imply that regional variations in the prevalence and distribution of *C. albicans* strains may have significant implications for the diagnosis and treatment of infections caused by the fungus. While McManus et al. reported a significant difference in the distribution of clades between healthy individuals and patients with periodontitis, with clade 1 being enriched in *C. albicans* isolates from periodontitis

patients [76], Gong et al. did not find a significant correlation between patients undergoing hemodialysis or healthy controls and either the sequence types or clades [40]. Similarly, our study did not show a significant correlation between clade assignment and dental caries diagnosis. Therefore, it is necessary to conduct further research on this patient population by examining a larger number of patients with dental caries over an extended period, possibly before and after treatment, and using MLST to analyze multiple *Candida* isolates retrieved from each site and investigate multiple carious lesions.

This study had some limitations that should be considered. Firstly, the study was conducted at a single center, so the generalizability of the results may be limited compared to multi-center studies [77]. Secondly, only a limited number of clinical isolates from the study participants were genotyped, mainly salivary isolates, and in cases where *C. albicans* was not detected in saliva, plaque samples were used instead. Future research could benefit from the comparison of *C. albicans* isolates obtained from various body parts (e.g., gastrointestinal and vaginal) in addition to oral samples collected from the same subjects or across different subjects. Thirdly, the sample size of mother-child pairs sharing *C. albicans* was relatively small, which limited statistical power to compare various parameters between the cases or to evaluate associations between molecular types (e.g., *C. albicans* DSTs) and clinicopathological data (e.g., gender, age, and diagnosis). Finally, while MLST is a well-established method for characterizing *C. albicans* [39, 44, 75], we did not use a complementary method to verify the genetic relatedness of *C. albicans* isolates between mothers and their children.

One strength of the study is that it is the first to use MLST to characterize *C. albicans* isolated from the oral cavities of mother-child dyads.

## Future perspectives

Future studies could use higher throughput genome-wide sequencing and more sophisticated models to better understand the population dynamics of medically relevant yeast in different epidemiological settings [78], which could inform preventative and therapeutic treatments and strategies. Moreover, future in vitro studies could help assess the virulence or cariogenic potential of those clinical *C. albicans* isolates. Additionally, it would be interesting to investigate how *C. albicans*' genotypes affect caries susceptibility in different ethnic or geographical populations.

## Conclusion

This study provides evidence supporting the transmission of highly related strains of *C. albicans* from mothers to their children, particularly during early childhood. Maternal factors, such as oral hygiene practice reflected by dental plaque accumulation were found to increase the transmission of *C. albicans* from mothers to their children. Additionally, race and daycare attendance played a significant role in the acquisition of *C. albicans* from non-maternal sources. These findings emphasize the importance of maternal socioeconomic status and oral health in preventing the transmission of oral pathogens. Incorporating screening for maternal fungal oral carriage and implementing oral health education programs during the perinatal stage may prove valuable in preventing fungal transmission in early infancy.

## Supporting information

**S1 Checklist. Inclusivity in global research.**  
(DOCX)

**S1 Appendix. Additional description for methods section.**

(DOCX)

**S1 Table. Number and source of *C. albicans* isolates used in the MLST analysis.**

(DOCX)

**S2 Table. Characteristics of the seven housekeeping loci used in *C. albicans* MLST.**

(DOCX)

**S3 Table. Novel allele sequences for each locus identified in our study.**

(DOCX)

**S1 Fig. Summary of the current understanding of the ancestry and phylogeny of *Candida albicans*.** The evolutionary pathway of *C. albicans* is indicated in italicized typeface on a lighter grey background. Taxonomic classifications are indicated in plain typeface on a darker grey background. The summary was adapted from in addition to using the online databases <http://www.catalogueoflife.org/> and <http://www.mycobank.org/>.

(DOCX)

**S2 Fig. Child feeding pattern during the first two years of life.** The proportion of children who were exclusively breastfed decreased steadily from 36% at one month to 4% at two years. Conversely, the proportion of children who were exclusively bottle-fed nearly doubled from 29% at one month to 56% at six months, then remained stable from 6 to 12 months before sharply declining at 18 months. Night breastfeeding gradually decreased from 68% at one month to 3% at the age of two years. During the first six months, approximately 70% of children were fed with a bottle at night, but this declined sharply after six months and reached 3% by the time they were 18 months old.

(DOCX)

**S3 Fig. UPGMA dendrogram of 227 *C. albicans* clinical oral isolates from our study.** 227

Isolates were grouped into 6 clades. The metadata, including the corresponding DST number, allelic profiles, eBURST clonal complex assignment, UPGMA clade, age, sex, oral source, and the diagnosis of dental caries of each isolate, is displayed on the right. A reference strain of *C. albicans* SC5314 has been included.

(XLSX)

**S4 Fig. UPGMA dendrogram of 3000 *C. albicans* isolates with different DSTs from the database and 227 clinical isolates from our study.** The DSTs of the population isolates were categorized into 19 clades that were previously identified, and a new clade designated as "N". Additionally, there were some singletons present marked as S. To facilitate easy identification, we have highlighted the DSTs of the isolates from our study in green.

(XLSX)

**S1 Dataset. Metadata.**

(XLSX)

## Acknowledgments

The authors express their gratitude to the First Tooth Study members who helped in obtaining saliva and plaque samples from the study participants. They also extend their appreciation to the medical professionals, staff, and clinical administration at the University of Rochester Highland Family Medicine and Perinatal Dental Clinic for their invaluable assistance during the study visits. Furthermore, they acknowledge the University of Rochester Genomic Research Center, particularly Dr. Anthony Gaca, for performing the WGS data.



## Author Contributions

**Conceptualization:** Naemah Alkhars, Jin Xiao.

**Data curation:** Naemah Alkhars, Nisreen Al Jallad.

**Formal analysis:** Naemah Alkhars, Tong Tong Wu, Jin Xiao.

**Funding acquisition:** Jin Xiao.

**Investigation:** Naemah Alkhars.

**Methodology:** Naemah Alkhars, Nisreen Al Jallad, Jin Xiao.

**Project administration:** Naemah Alkhars.

**Software:** Naemah Alkhars.

**Supervision:** Jin Xiao.

**Validation:** Tong Tong Wu, Jin Xiao.

**Visualization:** Naemah Alkhars.

**Writing – original draft:** Naemah Alkhars, Jin Xiao.

**Writing – review & editing:** Naemah Alkhars, Nisreen Al Jallad, Tong Tong Wu, Jin Xiao.

## References

1. Hall RA, Noverr MC. Fungal interactions with the human host: exploring the spectrum of symbiosis. *Curr Opin Microbiol*. 2017; 40:58–64. <https://doi.org/10.1016/j.mib.2017.10.020> PMID: 29132066
2. Krom BP, Kidwai S, ten Cate JM. *Candida* and Other Fungal Species: Forgotten Players of Healthy Oral Microbiota. *Journal of dental research*. 2014; 93(5):445–51. <https://doi.org/10.1177/0022034514521814> PMID: 24487378
3. Pincus DH, Orenga S, Chatellier S. Yeast identification—past, present, and future methods. *Med Mycol*. 2007; 45(2):97–121. <https://doi.org/10.1080/13693780601059936> PMID: 17365647
4. Xiao J, Fiscella KA, Gill SR. Oral microbiome: possible harbinger for children's health. *Int J Oral Sci*. 2020; 12(1):12. <https://doi.org/10.1038/s41368-020-0082-x> PMID: 32350240
5. Al-Rusan RM, Darwazeh AMG, Lataifeh IM. The relationship of *Candida* colonization of the oral and vaginal mucosae of mothers and oral mucosae of their newborns at birth. *Oral Surg Oral Med Oral Pathol Oral Radiol*. 2017; 123(4):459–63. <https://doi.org/10.1016/j.oooo.2017.01.003> PMID: 28283094
6. Benjamin DK Jr, Stoll BJ, Fanaroff AA, McDonald SA, Oh W, Higgins RD, et al. Neonatal candidiasis among extremely low birth weight infants: risk factors, mortality rates, and neurodevelopmental outcomes at 18 to 22 months. *Pediatrics*. 2006; 117(1):84–92. <https://doi.org/10.1542/peds.2004-2292> PMID: 16396864
7. Waggoner-Fountain LA, Walker MW, Hollis RJ, Pfaller MA, Ferguson JE, 2nd, Wenzel RP, et al. Vertical and horizontal transmission of unique *Candida* species to premature newborns. *Clin Infect Dis*. 1996; 22(5):803–8. <https://doi.org/10.1093/clinids/22.5.803> PMID: 8722935
8. Barnett JA. A history of research on yeasts 12: medical yeasts part 1, *Candida albicans*. *Yeast*. 2008; 25(6):385–417. <https://doi.org/10.1002/yea.1595> PMID: 18509848
9. McManus BA, Coleman DC. Molecular epidemiology, phylogeny and evolution of *Candida albicans*. *Infection, genetics and evolution: journal of molecular epidemiology and evolutionary genetics in infectious diseases*. 2014; 21:166–78. <https://doi.org/10.1016/j.meegid.2013.11.008> PMID: 24269341
10. Issa SY, Badran EF, Aqel KF, Shehabi AA. Epidemiological characteristics of *Candida* species colonizing oral and rectal sites of Jordanian infants. *BMC Pediatr*. 2011; 11:79. <https://doi.org/10.1186/1471-2431-11-79> PMID: 21902841
11. Saghrouni F, Ben Abdeljelil J, Boukadida J, Ben Said M. Molecular methods for strain typing of *Candida albicans*: a review. *J Appl Microbiol*. 2013; 114(6):1559–74. <https://doi.org/10.1111/jam.12132> PMID: 23311504
12. Belen A, Pavon I, Maiden MCJ. Multilocus sequence typing. *Methods Mol Biol*. 2009; 551:129–40. [https://doi.org/10.1007/978-1-60327-999-4\\_11](https://doi.org/10.1007/978-1-60327-999-4_11) PMID: 19521872

13. Chowdhary A, Lee-Yang W, Lasker BA, Brandt ME, Warnock DW, Arthington-Skaggs BA. Comparison of multilocus sequence typing and Ca3 fingerprinting for molecular subtyping epidemiologically-related clinical isolates of *Candida albicans*. *Med Mycol*. 2006; 44(5):405–17. <https://doi.org/10.1080/13693780600612230> PMID: 16882607
14. Doman M, Makrai L, Lengyel G, Kovacs R, Majoros L, Banyai K. Molecular Diversity and Genetic Relatedness of *Candida albicans* Isolates from Birds in Hungary. *Mycopathologia*. 2021; 186(2):237–44. <https://doi.org/10.1007/s11046-021-00527-3> PMID: 33512664
15. Kleinegger C, Lockhart SR, Vargas K, Soll DR. Frequency, Intensity, Species, and Strains of Oral *Candida* Vary as a Function of Host Age. *Journal of Clinical Microbiology*. 1996; 34(9):2246–54. <https://doi.org/10.1128/jcm.34.9.2246-2254.1996> PMID: 8862593
16. Patil S, Rao RS, Majumdar B, Anil S. Clinical Appearance of Oral *Candida* Infection and Therapeutic Strategies. *Front Microbiol*. 2015; 6:1391. <https://doi.org/10.3389/fmicb.2015.01391> PMID: 26733948
17. Lyu X, Zhao C, Yan ZM, Hua H. Efficacy of nystatin for the treatment of oral candidiasis: a systematic review and meta-analysis. *Drug Des Devel Ther*. 2016; 10:1161–71. <https://doi.org/10.2147/DDDT.S100795> PMID: 27042008
18. Sarifakioglu E, Gunduz C, Gorpelioglu C. Oral mucosa manifestations in 100 pregnant versus non-pregnant patients: an epidemiological observational study. *Eur J Dermatol*. 2006; 16(6):674–6. PMID: 17229610
19. Khadija B, Abbasi A, Khan S, Nadeem M, Badshah L, Faryal R. Isolation of pathogenic *Candida* species from oral cavity of postpartum females, and its association with obstetric and dental problems. *Microb Pathog*. 2019; 131:40–6. <https://doi.org/10.1016/j.micpath.2019.03.022> PMID: 30905714
20. Choukri F, Benderdouche M, Sednaoui P. In vitro susceptibility profile of 200 recent clinical isolates of *Candida* spp. to topical antifungal treatments of vulvovaginal candidiasis, the imidazoles and nystatin agents. *J Mycol Med*. 2014; 24(4):303–7. <https://doi.org/10.1016/j.mycmed.2014.05.001> PMID: 25442913
21. French W, Gad A. The frequency of *Candida* infections in pregnancy and their treatment with clotrimazole. *Current Medical Research and Opinion*. 1977; 4(9):640–4. <https://doi.org/10.1185/03007997709115284> PMID: 563316
22. Matheson A, Mazza D. Recurrent vulvovaginal candidiasis: A review of guideline recommendations. *Aust N Z J Obstet Gynaecol*. 2017; 57(2):139–45. <https://doi.org/10.1111/ajo.12592> PMID: 28299777
23. Jacobsen ID, Wilson D, Wachtler B, Brunke S, Naglik JR, Hube B. *Candida albicans* dimorphism as a therapeutic target. *Expert Rev Anti Infect Ther*. 2012; 10(1):85–93. <https://doi.org/10.1586/eri.11.152> PMID: 22149617
24. Raja M, Hannan A, Ali K. Association of oral candidal carriage with dental caries in children. *Caries Res*. 2010; 44(3):272–6. <https://doi.org/10.1159/000314675> PMID: 20516688
25. Falsetta ML, Klein MI, Colonne PM, Scott-Anne K, Gregoire S, Pai CH, et al. Symbiotic relationship between *Streptococcus mutans* and *Candida albicans* synergizes virulence of plaque biofilms in vivo. *Infection and immunity*. 2014; 82(5):1968–81. <https://doi.org/10.1128/IAI.00087-14> PMID: 24566629
26. Nikawa H, Yamashiro H, Makihira S, Nishimura M, Egusa H, Furukawa M, et al. In vitro cariogenic potential of *Candida albicans*. *Mycoses*. 2003; 46(11-12):471–8. <https://doi.org/10.1046/j.0933-7407.2003.00888.x> PMID: 14641620
27. Thein ZM, Samaranyake YH, Samaranyake LP. Effect of oral bacteria on growth and survival of *Candida albicans* biofilms. *Arch Oral Biol*. 2006; 51(8):672–80. <https://doi.org/10.1016/j.archoralbio.2006.02.005> PMID: 16620775
28. Moalic E, Gestalin A, Quinio D, Gest PE, Zerilli A, Le Flohic AM. The extent of oral fungal flora in 353 students and possible relationships with dental caries. *Caries Res*. 2001; 35(2):149–55. <https://doi.org/10.1159/000047447> PMID: 11275676
29. Rozkiewicz D, Daniluk T, Zaremba ML, Cylwik-Rokicka D, Stokowska W, Pawinska M, et al. Oral *Candida albicans* carriage in healthy preschool and school children. *Advances in medical sciences*. 2006;51.
30. de Carvalho FG, Silva DS, Hebling J, Spolidorio LC, Spolidorio DM. Presence of mutans streptococci and *Candida* spp. in dental plaque/dentine of carious teeth and early childhood caries. *Arch Oral Biol*. 2006; 51(11):1024–8. <https://doi.org/10.1016/j.archoralbio.2006.06.001> PMID: 16890907
31. Yang XQ, Zhang Q, Lu LY, Yang R, Liu Y, Zou J. Genotypic distribution of *Candida albicans* in dental biofilm of Chinese children associated with severe early childhood caries. *Arch Oral Biol*. 2012; 57(8):1048–53. <https://doi.org/10.1016/j.archoralbio.2012.05.012> PMID: 22717324
32. Mitchell SC, Ruby JD, Moser S, Momeni S, Smith A, Osgood R, et al. Maternal Transmission of Mutans Streptococci in Severe-Early Childhood Caries. *Pediatr Dent*. 2009. PMID: 19552223

33. Alkhars N, Zeng Y, Alomeir N, Al Jallad N, Wu TT, Aboelmagd S, et al. Oral *Candida* Predicts *Streptococcus mutans* Emergence in Underserved US Infants. *Journal of dental research*. 2022; 101(1):54–62. <https://doi.org/10.1177/00220345211012385> PMID: 34018817
34. Bliss JM, Basavegowda KP, Watson WJ, Sheikh AU, Ryan RM. Vertical and horizontal transmission of *Candida albicans* in very low birth weight infants using DNA fingerprinting techniques. *Pediatr Infect Dis J*. 2008; 27(3):231–5. <https://doi.org/10.1097/INF.0b013e31815bb69d> PMID: 18277930
35. Xiao J, Moon Y, Li L, Rustchenko E, Wakabayashi H, Zhao X, et al. *Candida albicans* Carriage in Children with Severe Early Childhood Caries (S-ECC) and Maternal Relatedness. *PLoS One*. 2016; 11(10): e0164242. <https://doi.org/10.1371/journal.pone.0164242> PMID: 27741258
36. Xiao J, Fogarty C, Wu TT, Alkhars N, Zeng Y, Thomas M, et al. Oral health and *Candida* carriage in socioeconomically disadvantaged US pregnant women. *BMC Pregnancy Childbirth*. 2019; 19(1):480. <https://doi.org/10.1186/s12884-019-2618-7> PMID: 31805881
37. [https://www.bioinformatics.babraham.ac.uk/projects/trim\\_galore/](https://www.bioinformatics.babraham.ac.uk/projects/trim_galore/). Accessed 2022.
38. Bankevich A, Nurk S, Antipov D, Gurevich AA, Dvorkin M, Kulikov AS, et al. SPAdes: a new genome assembly algorithm and its applications to single-cell sequencing. *J Comput Biol*. 2012; 19(5):455–77. <https://doi.org/10.1089/cmb.2012.0021> PMID: 22506599
39. Bounoux ME, Morand S, d'Enfert C. Usefulness of multilocus sequence typing for characterization of clinical isolates of *Candida albicans*. *J Clin Microbiol*. 2002; 40(4):1290–7. <https://doi.org/10.1128/JCM.40.4.1290-1297.2002> PMID: 11923347
40. Gong YB, Jin B, Qi H, Zhang R, Zhang XY, Yuan P, et al. Multilocus sequence typing of *Candida albicans* isolates from the oral cavities of patients undergoing haemodialysis. *Sci Rep*. 2018; 8(1):16413. <https://doi.org/10.1038/s41598-018-34565-7> PMID: 30401875
41. Choo KH, Lee HJ, Knight NJ, Holmes AR, Cannon RD. Multilocus sequence typing (MLST) analysis of *Candida albicans* isolates colonizing acrylic dentures before and after denture replacement. *Med Mycol*. 2017; 55(6):673–9. <https://doi.org/10.1093/mmy/myw128> PMID: 27915298
42. Tamura K, Stecher G, Kumar S. MEGA11: Molecular Evolutionary Genetics Analysis Version 11. *Mol Biol Evol*. 2021; 38(7):3022–7. <https://doi.org/10.1093/molbev/msab120> PMID: 33892491
43. Letunic I, Bork P. Interactive Tree Of Life (iTOL) v5: an online tool for phylogenetic tree display and annotation. *Nucleic Acids Res*. 2021; 49(W1):W293–w6. <https://doi.org/10.1093/nar/gkab301> PMID: 33885785
44. Tavanti A, Davidson AD, Fordyce MJ, Gow NA, Maiden MC, Odds FC. Population structure and properties of *Candida albicans*, as determined by multilocus sequence typing. *J Clin Microbiol*. 2005; 43(11):5601–13. <https://doi.org/10.1128/JCM.43.11.5601-5613.2005> PMID: 16272493
45. Zhou Z, Alikhan NF, Sergeant MJ, Luhmann N, Vaz C, Francisco AP, et al. GrapeTree: visualization of core genomic relationships among 100,000 bacterial pathogens. *Genome Res*. 2018; 28(9):1395–404. <https://doi.org/10.1101/gr.232397.117> PMID: 30049790
46. Nascimento M, Sousa A, Ramirez M, Francisco AP, Carriço JA, Vaz C. PHYLOViZ 2.0: providing scalable data integration and visualization for multiple phylogenetic inference methods. *Bioinformatics*. 2017; 33(1):128–9. <https://doi.org/10.1093/bioinformatics/btw582> PMID: 27605102
47. Mafla AC, Moran LS, Bernabe E. Maternal Oral Health and Early Childhood Caries amongst Low-Income Families. *Community Dent Health*. 2020; 37(3):223–8. [https://doi.org/10.1922/CDH\\_00040Mafla06](https://doi.org/10.1922/CDH_00040Mafla06) PMID: 32227706
48. Cannon RD, Holmes AR, Mason AB, Monk BC. Oral *Candida*: clearance, colonization, or candidiasis? *Journal of dental research*. 1995; 74(5):1152–61. <https://doi.org/10.1177/00220345950740050301> PMID: 7790592
49. Darwazeh AM, al-Bashir A. Oral candidal flora in healthy infants. *J Oral Pathol Med*. 1995; 24(8):361–4. <https://doi.org/10.1111/j.1600-0714.1995.tb01200.x> PMID: 7500292
50. Oliver DE, Shillitoe EJ. Effects of smoking on the prevalence and intraoral distribution of *Candida albicans*. *J Oral Pathol*. 1984; 13(3):265–70. <https://doi.org/10.1111/j.1600-0714.1984.tb01424.x> PMID: 6429300
51. Alrarrayes SF, Alruwaili HM, Taher IA, Elrahawy KM, Almaeen AH, Ashekhi AO, et al. Oral Candidal carriage and associated risk indicators among adults in Sakaka, Saudi Arabia. *BMC Oral Health*. 2019; 19(1):86. <https://doi.org/10.1186/s12903-019-0775-8> PMID: 31117990
52. Mata AD, Marques D, Rocha S, Francisco H, Santos C, Mesquita MF, et al. Effects of diabetes mellitus on salivary secretion and its composition in the human. *Mol Cell Biochem*. 2004; 261(1-2):137–42. <https://doi.org/10.1023/b:mcbi.0000028748.40917.6f> PMID: 15362496
53. Javed F, Klingspor L, Sundin U, Altamash M, Klinge B, Engstrom PE. Periodontal conditions, oral *Candida albicans* and salivary proteins in type 2 diabetic subjects with emphasis on gender. *BMC Oral Health*. 2009; 9:12. <https://doi.org/10.1186/1472-6831-9-12> PMID: 19435501

54. Patel M. Oral Cavity and *Candida albicans*: Colonisation to the Development of Infection. *Pathogens*. 2022; 11(3).
55. Jenks JD, Aneke CI, Al-Obaidi MM, Egger M, Garcia L, Gaines T, et al. Race and ethnicity: Risk factors for fungal infections? *PLoS Pathog*. 2023; 19(1):e1011025. <https://doi.org/10.1371/journal.ppat.1011025> PMID: 36602962
56. Velasquez PA, Parussolo L, Cardoso CL, Tognim MC, Garcia LB. High prevalence of children colonized with penicillin-resistant *Streptococcus pneumoniae* in public day-care centers. *J Pediatr (Rio J)*. 2009; 85(6):516–22. <https://doi.org/10.2223/JPED.1949> PMID: 20016869
57. de Lencastre H, Santos Sanches I, Brito-Avo A, Sa-Leao R, Saldanha J, Kristinsson KG, et al. Carriage and antibiotic resistance of respiratory pathogens and molecular epidemiology of antibiotic-resistant *Streptococcus pneumoniae* colonizing children in day-care centers in Lisbon: the Portuguese day-care center initiative. *Clin Microbiol Infect*. 1999; 5 Suppl 4:S55–S63. <https://doi.org/10.1111/j.1469-0691.1999.tb00858.x> PMID: 11869285
58. Muanda FT, Sheehy O, Bérard A. Use of antibiotics during pregnancy and the risk of major congenital malformations: a population based cohort study. *Br J Clin Pharmacol*. 2017; 83(11):2557–71. <https://doi.org/10.1111/bcp.13364> PMID: 28722171
59. Zisova LG, Chokoeva AA, Amaliev GI, Petleshkova PV, Miteva-Katrandzhieva Tcapital Em C, Krasteva MB, et al. Vulvovaginal Candidiasis in Pregnant Women and its Importance for *Candida* Colonization of Newborns. *Folia Med (Plovdiv)*. 2016; 58(2):108–14. <https://doi.org/10.1515/folmed-2016-0018> PMID: 27552787
60. Filippidi A, Galanakis E, Maraki S, Galani I, Drogari-Apiranthitou M, Kalmanti M, et al. The effect of maternal flora on *Candida* colonisation in the neonate. *Mycoses*. 2014; 57(1):43–8. <https://doi.org/10.1111/myc.12100> PMID: 23758480
61. Hoarau G, Bougnoux ME, Fily A, François N, Loridant S, Jawhara S, et al. Genetic diversity among *Candida albicans* isolates associated with vertical transmission in preterm triplets. *Mycopathologia*. 2014; 178(3-4):285–90. <https://doi.org/10.1007/s11046-014-9803-z> PMID: 25151365
62. Zöllner MS, Jorge AO. *Candida* spp. occurrence in oral cavities of breastfeeding infants and in their mothers' mouths and breasts. *Pesquisa odontologica brasileira = Brazilian oral research*. 2003; 17(2):151–5.
63. Azevedo MJ, Pereira ML, Araujo R, Ramalho C, Zaura E, Sampaio-Maia B. Influence of delivery and feeding mode in oral fungi colonization - a systematic review. *Microb Cell*. 2020; 7(2):36–45. <https://doi.org/10.15698/mic2020.02.706> PMID: 32025512
64. Azevedo MJ, Araujo R, Campos J, Campos C, Ferreira AF, Falcão-Pires I, et al. Vertical Transmission and Antifungal Susceptibility Profile of Yeast Isolates from the Oral Cavity, Gut, and Breastmilk of Mother–Child Pairs in Early Life. *International journal of molecular sciences*. 2023; 24(2). <https://doi.org/10.3390/ijms24021449> PMID: 36674962
65. Steckslen-Blicks C, Granstrom E, Silfverdal SA, West CE. Prevalence of oral *Candida* in the first year of life. *Mycoses*. 2015; 58(9):550–6. <https://doi.org/10.1111/myc.12355> PMID: 26214300
66. Vainionpaa A, Tuomi J, Kantola S, Anttonen V. Neonatal thrush of newborns: Oral candidiasis? *Clin Exp Dent Res*. 2019; 5(5):580–2. <https://doi.org/10.1002/cre2.213> PMID: 31687193
67. Hu L, He C, Zhao C, Chen X, Hua H, Yan Z. Characterization of oral candidiasis and the *Candida* species profile in patients with oral mucosal diseases. *Microb Pathog*. 2019; 134:103575. <https://doi.org/10.1016/j.micpath.2019.103575> PMID: 31175972
68. Hannula J, Saarela M, Jousimies-Somer H, Takala A, Syrjanen R, Kononen E, et al. Age-related acquisition of oral and nasopharyngeal yeast species and stability of colonization in young children. *Oral Microbiol Immunol*. 1999; 14(3):176–82. <https://doi.org/10.1034/j.1399-302x.1999.140306.x> PMID: 10495712
69. Azad MB, Konya T, Maughan H.S. GD, Field CJ, Sears MR, et al. Infant gut microbiota and the hygiene hypothesis of allergic disease: impact of household pets and siblings on microbiota composition and diversity. *Allergy, Asthma & Clinical Immunology*. 2013; 9(15). <https://doi.org/10.1186/1710-1492-9-15> PMID: 23607879
70. Dominguez-Bello MG, Costello EK, Contreras M, Magris M, Hidalgo G, Fierer N, et al. Delivery mode shapes the acquisition and structure of the initial microbiota across multiple body habitats in newborns. *Proc Natl Acad Sci U S A*. 2010; 107(26):11971–5. <https://doi.org/10.1073/pnas.1002601107> PMID: 20566857
71. Jost T, Lacroix C, Braegger CP, Rochat F, Chassard C. Vertical mother-neonate transfer of maternal gut bacteria via breastfeeding. *Environ Microbiol*. 2014; 16(9):2891–904. <https://doi.org/10.1111/1462-2920.12238> PMID: 24033881

72. Damle SG, Yadav R, Garg S, Dhindsa A, Beniwal V, Loomba A, et al. Transmission of mutans streptococci in mother-child pairs. *Indian J Med Res.* 2016; 144(2):264–70. <https://doi.org/10.4103/0971-5916.195042> PMID: 27934807
73. Bougnoux ME, Diogo D, Francois N, Sendid B, Veirmeire S, Colombel JF, et al. Multilocus sequence typing reveals intrafamilial transmission and microevolutions of *Candida albicans* isolates from the human digestive tract. *J Clin Microbiol.* 2006; 44(5):1810–20. <https://doi.org/10.1128/JCM.44.5.1810-1820.2006> PMID: 16672411
74. Odds FC, Bougnoux ME, Shaw DJ, Bain JM, Davidson AD, Diogo D, et al. Molecular phylogenetics of *Candida albicans*. *Eukaryot Cell.* 2007; 6(6):1041–52. <https://doi.org/10.1128/EC.00041-07> PMID: 17416899
75. Odds FC, Jacobsen MD. Multilocus sequence typing of pathogenic *Candida* species. *Eukaryot Cell.* 2008; 7(7):1075–84. <https://doi.org/10.1128/EC.00062-08> PMID: 18456859
76. McManus BA, Maguire R, Cashin PJ, Claffey N, Flint S, Abdulrahim MH, et al. Enrichment of multilocus sequence typing clade 1 with oral *Candida albicans* isolates in patients with untreated periodontitis. *J Clin Microbiol.* 2012; 50(10):3335–44. <https://doi.org/10.1128/JCM.01532-12> PMID: 22875886
77. Tsai MH, Wang SH, Hsu JF, Lin LC, Chu SM, Huang HR, et al. Clinical and molecular characteristics of bloodstream infections caused by *Candida albicans* in children from 2003 to 2011. *Clin Microbiol Infect.* 2015; 21(11):1018 e1–8. <https://doi.org/10.1016/j.cmi.2015.06.024> PMID: 26148466
78. Moorhouse AJ, Rennison C, Raza M, Lilic D, Gow NA. Clonal Strain Persistence of *Candida albicans* Isolates from Chronic Mucocutaneous Candidiasis Patients. *PLoS One.* 2016; 11(2):e0145888. <https://doi.org/10.1371/journal.pone.0145888> PMID: 26849050
